# Supplementary material for: Modulation of Photorespiratory Enzymes by Oxidative and Photo-Oxidative Stress Induced by Menadione in Leaves of Pea (Pisum sativum)
Source: MDPI journal article supplement (doi:10.3390/plants10050987), 2021-05-15
Supplement: s1 [file s1]

## Supplementary Data

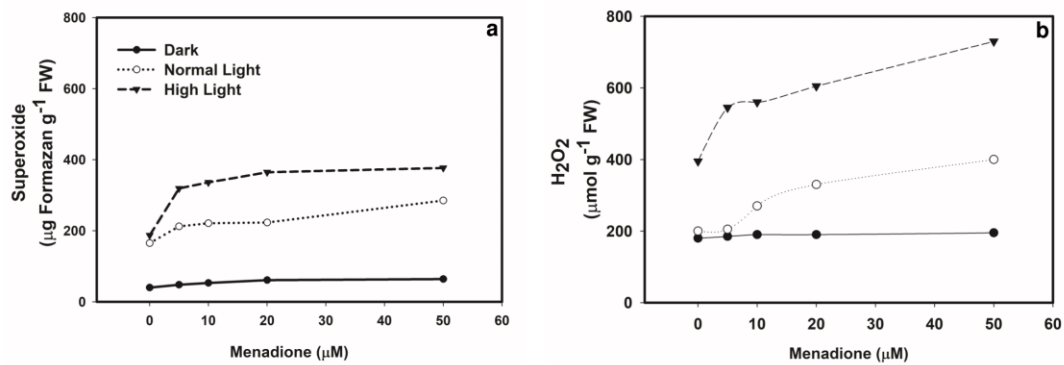

**Supplementary Figure S1.** Accumulation of ROS in leaf discs of pea with varying concentrations of MD (0 to 50  $\mu\text{M}$ ). **(a)** The superoxide levels were quantified as formazan formed after incubation with NBT, while the levels of  $\text{H}_2\text{O}_2$  **(b)** were measured with DAB. The values given are the averages of two experiments done on different days.

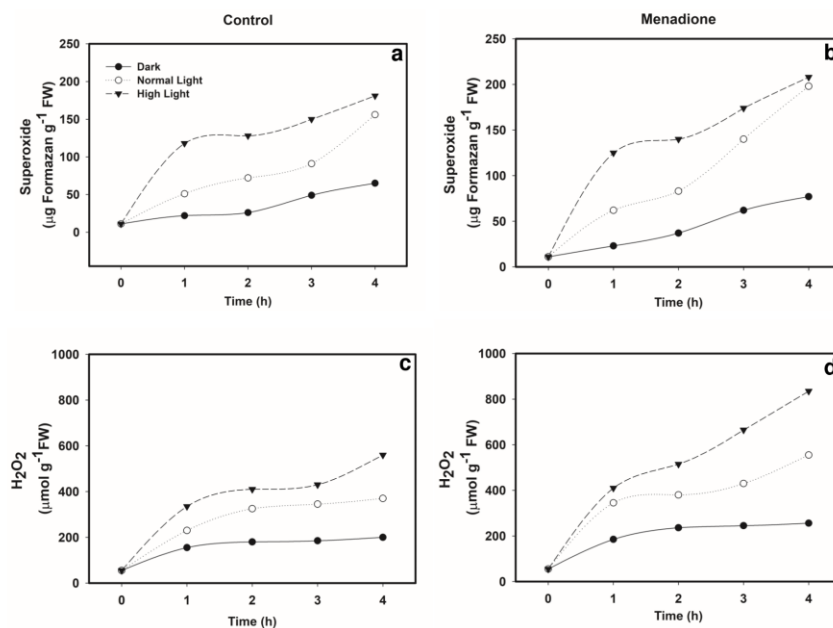

**Supplementary Figure S2.** ROS levels in pea leaf discs after treatment with MD (10  $\mu\text{M}$ ) for varying periods in dark, NL or HL intensities. Superoxide levels were quantified as formazan after incubating with NBT **(a and b)**, while the levels of  $\text{H}_2\text{O}_2$  were measured by DAB staining **(c and d)**. The values given are the averages of two experiments done on different days.

\* \* \* \* \*

**Supplementary Table S1.** Sequences of primers used in semi-quantitative RT-PCR. The complete genome of *Pisum sativum* is not yet available [1]. The primers were therefore designed on the basis of ESTs available in the cool-season food legume database (<https://www.coolseasonfoodlegume.org/>). When these primer sequences were run on BLAST, they showed 75% sequence identity with the enzymes in *Arabidopsis*.

| Gene             | Primer sequence (5'-3')                                              |
|------------------|----------------------------------------------------------------------|
| <i>APX</i>       | F: GGATCCTATGGGAAAATCATACCCAACTG<br>R: CTCGAGTCTTAGGCTTCAGCAAATCCAAG |
| <i>GR</i>        | F: TTTTGCGAACACTGCTTTTG<br>R: AGCCTGAGGTGAAGACCAGA                   |
| <i>Cu/Zn SOD</i> | F: GAACAATGGTGAAGGCTGTG<br>R: GTGACCACCTTTCCCAAGAT                   |
| <i>Fe SOD</i>    | F: GCACCACAGAGCTTATGTAG<br>R: GGAGTGGATGATGATGGTTC                   |
| <i>Mn SOD</i>    | F: GGAGCAAGTTTGGTTCCATT<br>R: AAGGTTATTCGGCCAGATTG                   |
| <i>CAT</i>       | F: CGAGGTATGACCAGGTTCGT<br>R: AGGGCATCAATCCATCTCTG                   |
| <i>GO</i>        | F: GCTTCCCTGCGTCCGAGTCTT<br>R: GTGAGCAAGATCGACATG                    |
| <i>HPR</i>       | F: CAGGTCCTC TAC TGC AGT<br>R: TTG GTG TTA TCG GTG CTGG              |
| <i>GK</i>        | F: ATCCCTATCTTCTGCTCC<br>R: GAC ATA CAC CGA TTT TCC                  |
| <i>PGLP</i>      | F: GGCGGGGATGGT ATACTGGA<br>R: TTGATCCACACATGCCGC                    |
| <i>Actin 2</i>   | F: AATGGTGAAGGCTGGATTTG<br>R: AGCAAGATCCAAACGAAGGA                   |

1. Kulaeva, O.A.; Zhernakov, A.I.; Afonin, A.M.; Boikov, S.S.; Sulima, A.S.; Tikhonovich, I.A.; Zhukov, V.A. Pea marker data-base (PMD)—A new online database combining known pea (*Pisum sativum* L.) gene-based markers. *PLoS ONE* **2017**, *12*, e018713.
